# Supplementary material for: The Stakeholders’ Views on Planting Trees to Control Schistosomiasis in China
Source: MDPI journal article supplement (doi:10.3390/ijerph17030939), 2020-02-03
Supplement: s1 [file s1]

Table S1. The questionnaire for the administrator

|                                                                                                          |        |                |                |
|----------------------------------------------------------------------------------------------------------|--------|----------------|----------------|
| Date:                                                                                                    | Place: | Interviewer 1: | Interviewer 2: |
| <b>Section 1</b>                                                                                         |        |                |                |
| 1. Name:                                                                                                 |        | Institute:     |                |
| 2. What is your familiarity with the knowledge of schistosomiasis?                                       |        |                |                |
| A. Very familiar    B. Familiar    C. Relatively familiar    D. less familiar    E. Unfamiliar           |        |                |                |
| <b>Section 2</b>                                                                                         |        |                |                |
| 3. What are the main activities practiced in the sites before planting? (multiple choices)               |        |                |                |
| A. Growing crops and vegetables    B. Aquaculture    C. Poultry farming    D. Livestock                  |        |                |                |
| E. Growing reeds    F. Others, please fill in _____                                                      |        |                |                |
| 4. What is the most effective way to control grazing?                                                    |        |                |                |
| A. Planting trees    B. Education and warning signs    C. Seal surface    D. Closure                     |        |                |                |
| E. Financial compensation    F. Replace buffalos with machinery                                          |        |                |                |
| 5. What prevention and control measures have been practiced in your region?                              |        |                |                |
| A. Examine and treat diseases    B. Replace buffalos with machinery    C. Seal surface    D. Plant trees |        |                |                |
| E. Improve water supply and toilets    F. Chemical control    G. Nothing                                 |        |                |                |
| <b>Section 3</b>                                                                                         |        |                |                |
| 6. How does the planting program affect snail densities?                                                 |        |                |                |
| A. Increased significantly    B. Increased    C. No change    D. Reduced                                 |        |                |                |
| E. Reduced significantly    F. Unknown                                                                   |        |                |                |
| 7. How does the planting program affect the incidence of schistosomiasis?                                |        |                |                |
| A. Increased significantly    B. Increased    C. No change    D. Reduced                                 |        |                |                |
| E. Reduced significantly    F. Unknown                                                                   |        |                |                |
| 8. How does the planting program affect grazing in the infected area?                                    |        |                |                |
| A. Increased significantly    B. Increased    C. No change    D. Reduced                                 |        |                |                |
| E. Reduced significantly    F. Unknown                                                                   |        |                |                |
| 9. How does the planting program affect floods?                                                          |        |                |                |
| A. Protect banks and dikes    B. Change the flow paths of floods                                         |        |                |                |
| C. Create sand sedimentation    D. None of them                                                          |        |                |                |
| 10. How does the planting program affect wildlife?                                                       |        |                |                |
| A. Increased    B. No change    C. Reduced    D. Other                                                   |        |                |                |
| 11. How does the planting program affect the farmers' income?                                            |        |                |                |
| A. Increased significantly    B. Increased    C. No change    D. Reduced                                 |        |                |                |
| E. Reduced significantly    F. Unknown                                                                   |        |                |                |
